# Supplementary material for: Exploration and Comparison of the Behavior of Some Indigenous and International Varieties (Vitis vinifera L.) Grown in Climatic Conditions of Herzegovina: The Influence of Variety and Vintage on Physico-Chemical Characteristics of Grapes
Source: MDPI journal article supplement (doi:10.3390/plants12040695), 2023-02-04
Supplement: s1 [file s1]

**Table S1.** Physico-chemical parameters of investigated grape samples included in the principal component analysis (PCA).

| parameter/sample        | Blatina |        |        |        | Vranac |        |        |        | C.Sauvignon |        |        |        | Merlot |        |        |        |
|-------------------------|---------|--------|--------|--------|--------|--------|--------|--------|-------------|--------|--------|--------|--------|--------|--------|--------|
|                         | T2020   | T2021  | M2020  | M2021  | M2020  | M2021  | T2020  | T2021  | T2020       | T2021  | M2020  | M2021  | T2020  | T2021  | M2020  | M2021  |
| 22 Cluster weight       | 400.33  | 325.29 | 229.01 | 463.97 | 379.22 | 414.17 | 379.28 | 272.14 | 198.39      | 192.33 | 152.93 | 149.53 | 278.40 | 173.87 | 325.91 | 283.52 |
| 23 Cluster length       | 15.72   | 16.44  | 15.02  | 17.00  | 17.30  | 19.96  | 18.77  | 15.97  | 16.51       | 16.31  | 14.00  | 14.20  | 18.76  | 15.46  | 20.20  | 19.50  |
| 24 Cluster width        | 11.64   | 12.14  | 10.25  | 13.64  | 9.80   | 10.95  | 10.16  | 11.63  | 10.06       | 10.39  | 8.85   | 8.90   | 11.40  | 9.67   | 10.51  | 11.35  |
| 25 Rachis weight        | 6.54    | 7.02   | 7.56   | 7.21   | 7.07   | 7.52   | 7.09   | 7.48   | 5.48        | 6.08   | 4.07   | 3.98   | 4.71   | 2.75   | 4.50   | 4.47   |
| 26 Stalk length         | 2.88    | 3.38   | 3.22   | 2.99   | 2.64   | 1.22   | 2.06   | 2.36   | 2.25        | 1.56   | 2.13   | 2.08   | 2.86   | 3.21   | 3.03   | 1.54   |
| 27 Nb. of berries       | 194.90  | 115.20 | 78.90  | 145.00 | 156.20 | 161.10 | 139.00 | 130.08 | 207.90      | 155.20 | 120.70 | 125.70 | 206.40 | 121.00 | 195.10 | 184.40 |
| 28 Berries weight       | 393.80  | 318.27 | 221.45 | 456.77 | 372.15 | 406.65 | 372.19 | 264.66 | 192.91      | 186.25 | 148.86 | 145.55 | 273.69 | 171.12 | 321.41 | 279.05 |
| 29 % of rachis          | 1.64    | 2.04   | 3.29   | 1.56   | 1.83   | 1.80   | 1.82   | 2.73   | 2.78        | 3.16   | 2.64   | 2.66   | 1.68   | 1.55   | 1.33   | 1.54   |
| 30 % of berries         | 98.36   | 97.96  | 96.71  | 98.44  | 98.17  | 98.20  | 98.18  | 97.27  | 97.22       | 96.84  | 97.36  | 97.34  | 98.32  | 98.45  | 98.67  | 98.46  |
| 31 Weight of 10 berries | 22.26   | 29.79  | 32.00  | 33.00  | 28.41  | 29.04  | 29.76  | 26.56  | 11.39       | 12.84  | 12.63  | 12.62  | 15.18  | 15.09  | 20.06  | 15.87  |
| 32 Berry length         | 14.93   | 16.74  | 17.53  | 16.82  | 17.46  | 17.94  | 17.26  | 17.00  | 11.16       | 12.67  | 12.78  | 12.79  | 13.15  | 12.88  | 14.25  | 13.39  |
| 33 Berry width          | 14.72   | 16.85  | 16.91  | 16.83  | 15.41  | 16.36  | 16.08  | 15.51  | 11.40       | 12.41  | 12.49  | 12.41  | 13.18  | 12.82  | 14.16  | 13.19  |
| 34 Ratio L/W            | 1.01    | 0.99   | 1.04   | 1.00   | 1.13   | 1.10   | 1.07   | 1.10   | 0.98        | 1.02   | 1.02   | 1.03   | 1.00   | 1.00   | 1.01   | 1.01   |
| 35 Skin weight          | 2.45    | 1.20   | 1.78   | 1.42   | 3.03   | 1.82   | 2.04   | 1.63   | 0.87        | 0.90   | 1.20   | 1.19   | 1.03   | 0.74   | 2.71   | 1.11   |
| 36 Seeds weight         | 0.46    | 1.09   | 1.07   | 1.02   | 0.95   | 1.11   | 1.02   | 0.95   | 0.46        | 0.64   | 0.52   | 0.57   | 0.59   | 0.71   | 0.80   | 0.64   |
| 37 Nb. of seeds         | 17.50   | 22.80  | 25.70  | 18.70  | 18.30  | 22.50  | 22.70  | 18.52  | 16.50       | 17.10  | 15.50  | 16.00  | 20.40  | 19.20  | 21.60  | 18.10  |
| 38 Flesh weight         | 19.35   | 27.50  | 29.16  | 30.57  | 24.44  | 26.10  | 26.70  | 23.98  | 10.07       | 11.29  | 10.91  | 10.86  | 13.56  | 13.63  | 16.55  | 14.12  |
| 39 % Skin               | 11.39   | 4.02   | 5.62   | 4.35   | 10.61  | 6.33   | 6.89   | 6.13   | 7.56        | 7.02   | 9.51   | 9.51   | 6.82   | 5.02   | 13.38  | 7.08   |
| 40 % Seeds              | 2.01    | 3.62   | 3.31   | 3.13   | 3.32   | 3.86   | 3.43   | 3.59   | 3.98        | 5.03   | 4.10   | 4.47   | 3.89   | 4.71   | 3.97   | 4.07   |
| 41 % Flesh              | 86.60   | 92.35  | 91.07  | 92.52  | 86.07  | 89.81  | 89.67  | 90.28  | 88.46       | 87.95  | 86.39  | 86.02  | 89.29  | 90.27  | 82.65  | 88.85  |
| 42 TTS %                | 23.55   | 21.50  | 19.07  | 16.60  | 25.73  | 21.93  | 23.43  | 22.42  | 24.33       | 22.83  | 25.48  | 24.50  | 24.85  | 23.07  | 26.33  | 25.93  |
| 43 TTA gL <sup>-1</sup> | 4.88    | 7.13   | 6.44   | 8.21   | 4.51   | 5.82   | 4.10   | 5.56   | 5.37        | 6.77   | 5.10   | 5.02   | 6.07   | 6.48   | 4.68   | 5.96   |
| 44 pH                   | 3.04    | 2.97   | 2.92   | 3.28   | 3.20   | 3.55   | 3.21   | 3.24   | 2.79        | 3.32   | 3.65   | 3.70   | 3.01   | 3.11   | 3.50   | 3.34   |
